# Supplementary material
Source: Springer Nature journal article supplement (https://www.springermedizin.de/resource/supplementary/13054_2012_513_MOESM4_ESM.pdf/9708706)

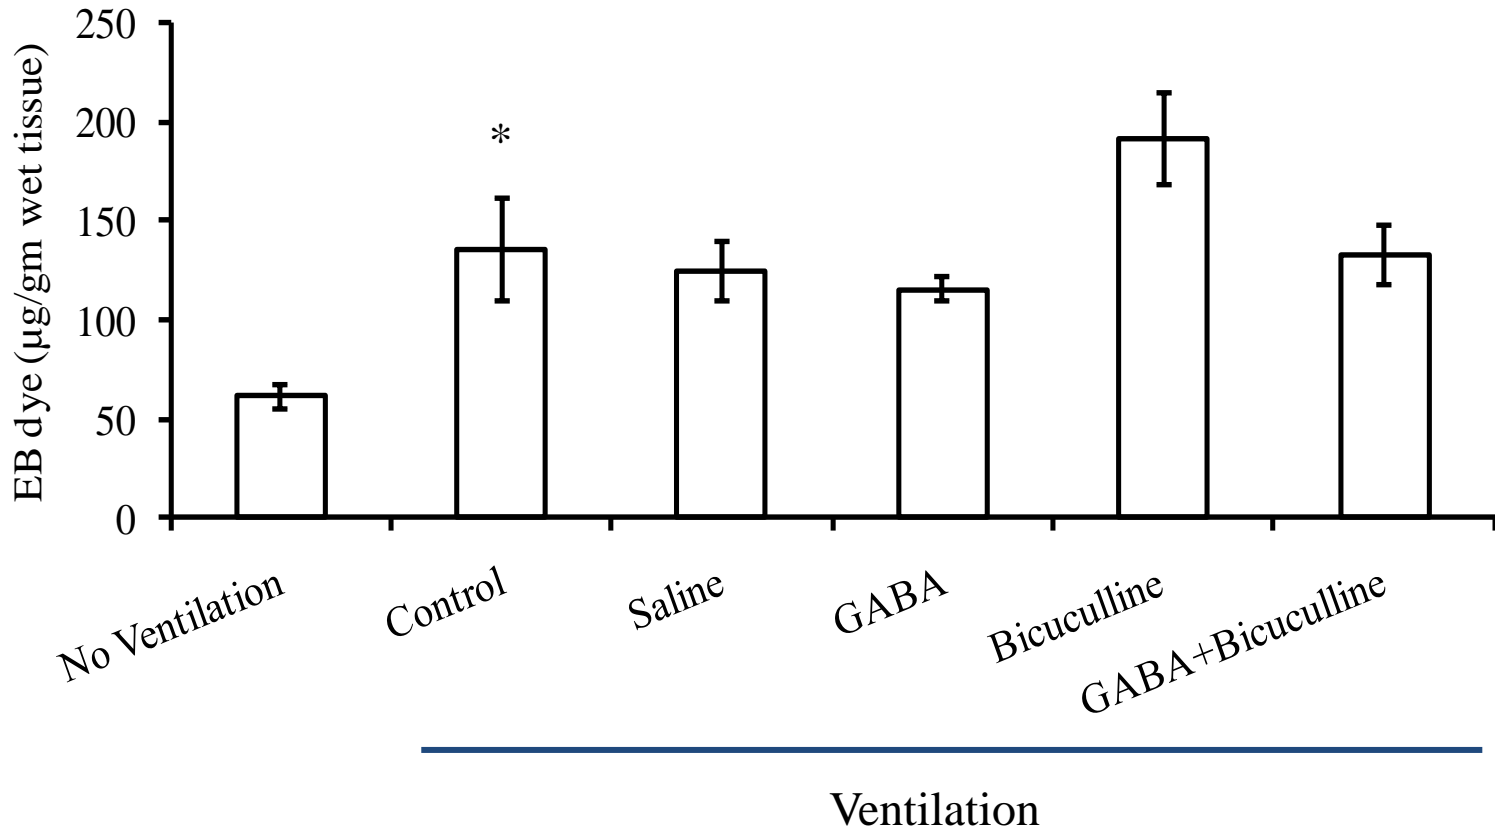

Supplement: MOESM4 [file 9708706]
